# Supplementary material
Source: PubMed Central journal article supplement (PMC6494704)

## Supplementary Online Content

Graboyes EM, Kompelli AR, Neskey DM, et al. Association of treatment delays with survival for patients with head and neck cancer: a systematic review. *JAMA Otolaryngol Head Neck Surg*. Published online November 1, 2018.

doi:10.1001/jamaoto.2018.2716

**eTable.** Institute of Health Economics Quality Appraisal Checklist for Case Series Studies

**eFigure.** PRISMA Flow Diagram

This supplementary material has been provided by the authors to give readers additional information about their work.

| <b>eTable. Institute of Health Economics Quality Appraisal Checklist for Case Series Studies</b>                                                  |
|---------------------------------------------------------------------------------------------------------------------------------------------------|
| 1. Is the hypothesis/aim/objective of the study clearly stated?                                                                                   |
| 2. Was the study conducted prospectively?                                                                                                         |
| 3. Were the cases collected in more than 1 center?                                                                                                |
| 4. Were patients recruited consecutively?                                                                                                         |
| 5. Were the characteristics of the patients included in the study described?                                                                      |
| 6. Are the inclusion and exclusion criteria (eligibility criteria) clearly reported?                                                              |
| 7. Did patients enter the study at a similar point in the disease?                                                                                |
| 8. Was the intervention of interest clearly described?                                                                                            |
| 9. Were additional interventions (co-interventions) clearly described?                                                                            |
| 10. Were relevant outcome measures established a priori?                                                                                          |
| 11. Were outcome assessors blinded to the intervention that patients received?                                                                    |
| 12. Were the relevant outcomes measured using appropriate objective/subjective methods?                                                           |
| 13. Were relevant outcome measures made before and after the intervention?                                                                        |
| 14. Were statistical tests used to assess the relevant outcomes?                                                                                  |
| 15. Was follow-up long enough for important events and outcomes to occur?                                                                         |
| 16. Were losses to follow-up reported?                                                                                                            |
| 17. Did the study provide estimates of random variability in the data analysis of relevant outcomes?                                              |
| 18. Were adverse events reported?                                                                                                                 |
| 19. Were conclusions of the study supported by the results?                                                                                       |
| 20. Were both competing interests and sources of support received for the study or about the relationship of the author(s) or other contributors? |
| Yes=1, No or Unclear=0, Min = 0, Max = 20                                                                                                         |

eFigure. PRISMA Flow Diagram

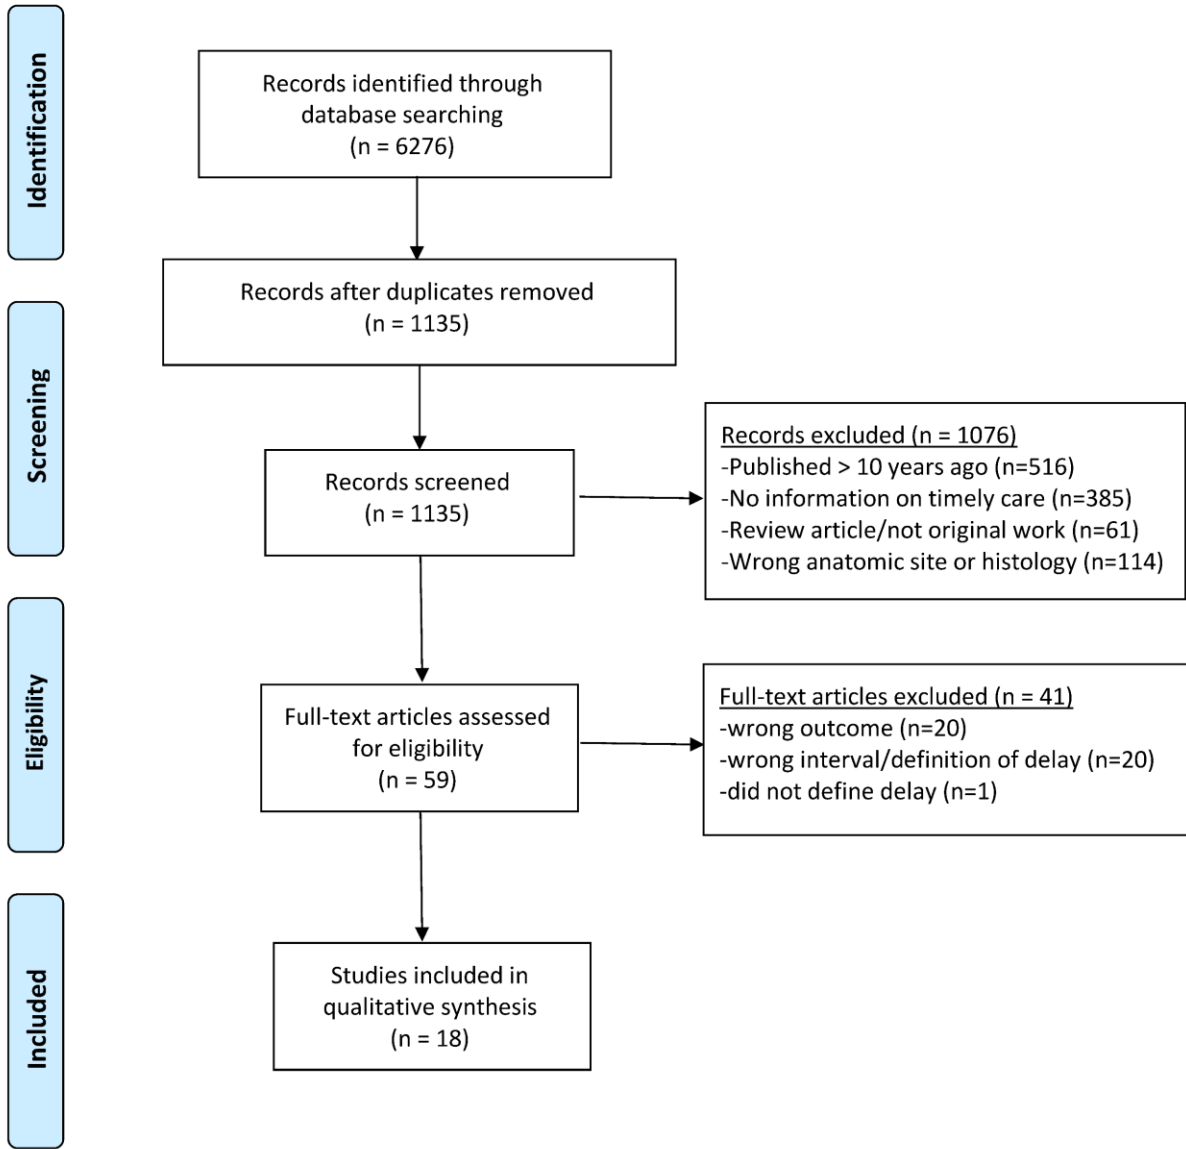

Supplement: NIHMS996019-supplement-Supplemental.pdf [file NIHMS996019-supplement-Supplemental.pdf]
